# Supplementary material for: Antibiogram Profile and Detection of Resistance Genes in Pseudomonas aeruginosa Recovered from Hospital Wastewater Effluent
Source: MDPI journal article supplement (doi:10.3390/antibiotics12101517), 2023-10-06
Supplement: s1 [file s1]

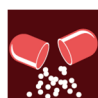

## Supplementary Materials

**Table S1.** Primer sequences of targeted resistance genes with their respective amplicon sizes and PCR cycling conditions.

| Gene Classification             | Target Gene                            | Primer Sequence (5'-3')                                                 | PCR Cycling Condition                                                                            | Product Size (bp) | References |
|---------------------------------|----------------------------------------|-------------------------------------------------------------------------|--------------------------------------------------------------------------------------------------|-------------------|------------|
| <i>β-lactam</i>                 |                                        |                                                                         |                                                                                                  | 688               | [32]       |
| <i>bla<sub>CTX-M1</sub></i>     | MultiCTXMGp1_for<br>MultiCTXMGp1-2_rev | TTAGGAARTGTGCCGCTGYA <sup>b</sup><br>CGATATCGTTGGTGGTRCCAT <sup>b</sup> | 94 °C (10 min),<br>94 °C (40 s), 60 °C<br>(40 s), 72 °C (1<br>min), 72 °C (7 min)<br>× 30 cycles |                   |            |
| <i>bla<sub>CTX-M2</sub></i>     | MultiCTXMGp2_for<br>MultiCTXMGp1-2_rev | CGTTAACGGCAGCATGAC<br>CGATATCGTTGGTGGTRCCAT <sup>b</sup>                | 94 °C (10 min),<br>94 °C (40 s), 60 °C<br>(40 s), 72 °C (1<br>min), 72 °C (7<br>min) × 30 cycles | 404               | [32]       |
| <i>bla<sub>CTX-M9</sub></i>     | MultiCTXMGp9_for<br>MultiCTXMGp9_rev   | TCAAGCCTGCCGATCTGGT<br>TGATTCTCGCCGCTGAAG                               | 94 °C (10 min),<br>94 °C (40 s), 60 °C<br>(40 s), 72 °C (1<br>min), 72 °C (7 min)<br>× 30 cycles | 561               | [32]       |
| <i>bla<sub>OXA-1-like</sub></i> | MultiTSO-O_for<br>MultiTSO-O_rev       | GGCACCAGAT-<br>TCAACTTTCAAG<br>GACCCCAAGTTTCCTG-<br>TAAGTG              | 94 °C (10 min),<br>94 °C (40 s), 60 °C<br>(40 s), 72 °C (1<br>min), 72 °C (7 min)<br>× 30 cycles | 564               | [32]       |
| <i>bla<sub>SHV</sub></i>        | MultiTSO-S_for<br>MultiTSO-S_rev       | AGCCGCTTGAG-<br>CAAATTAAAC ATCCCG-<br>CAGATAAATCACCAC                   | 94 °C (10 min),<br>94 °C (40 s), 60 °C<br>(40 s), 72 °C (1<br>min), 72 °C (7 min)<br>× 30 cycles | 713               | [32]       |
| <i>bla<sub>TEM</sub></i>        | MultiTSO-T_for<br>MultiTSO-T_rev       | CATTTCGTCGCCCCATTTC<br>CGTTCATCCATAGTT-<br>GCCTGAC                      | 94 °C (10 min),<br>94 °C (40 s), 60 °C<br>(40 s), 72 °C (1<br>min), 72 °C (7 min)<br>× 30 cycles | 800               | [32]       |
| <i>bla<sub>VEB</sub></i>        | MultiVEB_for<br>MultiVEB_rev           |                                                                         | 94 °C (10 min),<br>94 °C (40 s), 60 °C<br>(40 s), 72 °C (1                                       | 648               | [32]       |

|                                               |                                                                          |                                                                |                                                                                                                                             |     |      |
|-----------------------------------------------|--------------------------------------------------------------------------|----------------------------------------------------------------|---------------------------------------------------------------------------------------------------------------------------------------------|-----|------|
| <i>bla<sub>PER</sub></i>                      | MultiPER_for<br>MultiPER_rev                                             | CATTTCCTCGATGCAAAGCGT<br>CGAAGTTTCTTTGGACTCTG                  | min), 72 °C (7 min)<br>× 30 cycles”<br>“94 °C (10 min), 94<br>°C (40 s), 57 °C (40<br>s), 72 °C (1 min), 72<br>°C (7 min) × 30 cy-<br>cles” | 520 | [32] |
|                                               |                                                                          | GCTCCGATAATGAAAGCGT<br>TTCGGCTTGACTCGGCTGA                     |                                                                                                                                             |     |      |
| <i>bla<sub>GES</sub></i>                      | MultiGES_for<br>MultiGES_rev                                             |                                                                |                                                                                                                                             | 399 | [32] |
|                                               |                                                                          |                                                                |                                                                                                                                             |     |      |
|                                               |                                                                          |                                                                |                                                                                                                                             |     |      |
| <b>Carbapenem</b><br><i>bla<sub>VIM</sub></i> | MultiVIM_for <sup>c</sup><br>MultiVIM_rev <sup>c</sup>                   | GATGGTGTGTTGGTCGCATA<br>CGAATGCGCAGCACCAG                      |                                                                                                                                             | 390 | [32] |
|                                               |                                                                          | TTGACACTCCATTTACDGB<br>GATYGAGAATTAAGCCA-<br>CYCT <sup>b</sup> | “94 °C (10 min),<br>94 °C (40 s), 55 °C<br>(40 s), 72 °C (1<br>min), 72 °C (7 min)<br>× 30 cycles”                                          |     |      |
|                                               | MultiIMP_for<br>MultiIMP_rev                                             | TTGGTGGCATCGATTATCGG<br>GAGC ACTT CTTT TGTG ATGG<br>C          | “94 °C (10 min),<br>94 °C (40 s), 57 °C<br>(40 s), 72 °C (1<br>min), 72 °C (7 min)<br>× 30 cycles”                                          | 139 | [32] |
|                                               |                                                                          |                                                                |                                                                                                                                             |     |      |
| <i>bla<sub>OXA-48-like</sub></i>              | <i>bla<sub>OXA-48-like-F</sub></i><br><i>bla<sub>OXA-48-like-R</sub></i> |                                                                |                                                                                                                                             | 281 | [32] |
| <i>bla<sub>NDM-1</sub></i>                    | <i>bla<sub>NDM-1-F</sub></i><br><i>bla<sub>NDM-1-R</sub></i>             | AAAACGGCAAGAAAAA-<br>GCAG<br>AAAACGGCAAGAAAAA-<br>GCAG         | “94 °C (10 min), 94<br>°C (40 s), 57°C (40<br>s), 72 °C (1 min), 72<br>°C (7 min) × 30 cy-<br>cles”                                         | 231 | [32] |
|                                               | <i>bla<sub>KPC-F</sub></i><br><i>bla<sub>KPC-R</sub></i>                 |                                                                | “94 °C (10 min), 94<br>°C (40 s), 55 °C (40<br>s), 72 °C (1 min), 72<br>°C (7 min) × 30 cy-<br>cles”                                        |     |      |
| <i>bla<sub>KPC</sub></i>                      |                                                                          | AAAACGGCAAGAAAAA-<br>GCAG<br>AAAACGGCAAGAAAAA-<br>GCAG         |                                                                                                                                             | 301 | [32] |

|                      |                                      |                                                     |                                                                                                      |     |      |
|----------------------|--------------------------------------|-----------------------------------------------------|------------------------------------------------------------------------------------------------------|-----|------|
| Quinolones           | <i>qnrA</i>                          | ATTCTCACGCCAGGATTG<br>GATCGGCAAAGGTTAGGTCA          | “94 °C (10 min),<br>94 °C (45 s), 53 °C<br>(45 s), 72 °C (1<br>min), 72 °C (7 min)<br>× 32 cycles”   | 448 | [33] |
|                      | <i>qnrB</i>                          | GATCGTGAAAGCCAGAAAGG<br>ACGATGCCTGGTAGTTGTCC        | “94 °C (10 min),<br>94 °C (45 s), 53 °C<br>(45 s), 72 °C (1<br>min), 72 °C (7 min)<br>× 32 cycles”   | 469 | [33] |
|                      | <i>qnrS</i>                          | ACGACATTCGTCAACTGCAA<br>TAAATTGGCACCCCTGTAGGC       | “94 °C (10 min),<br>94 °C (45 s), 53 °C<br>(45 s), 72 °C (1<br>min), 72 °C (7 min)<br>× 32 cycles”   | 417 | [33] |
| Aminoglyco-<br>sides | <i>aac(3)-IIa(aacC2)<sup>a</sup></i> | F:CGGAAGGCAATAACGGAG<br>R:TCGAACAGGTAGCACTGAG       | “94 °C (5 min),<br>94 °C (30 s), 50 °C<br>(30 s), 72 °C (1.30<br>min), 72 °C (5 min)<br>× 30 cycles” | 428 | [34] |
|                      | <i>aadA</i>                          | F:GTGGATGGCGGCCTGAA-<br>GCC<br>R:AATGCCCAGTCGGCAGCG | “94 °C (4 min),<br>94 °C (45 s), 50 °C<br>(45 s), 72 °C (45 s),<br>72 °C (7 min) × 30<br>cycles”     | 525 |      |
|                      | <i>strA</i>                          | F:CTTGGTGATAACGGCAATTC<br>R:CCAATCGCAGATAGAAGGC     | “94 °C (4 min),<br>94 °C (45 s), 50 °C<br>(45 s), 72 °C (45 s),<br>72 °C (7 min) × 30<br>cycles”     | 348 | [35] |
|                      | <i>aph(3)-Ia(aphA1)<sup>a</sup></i>  | F:ATGGGCTCGCGATAATGTC<br>R:CTCACCGAGGCAGTTCCAT      | “94 °C (5 min),<br>94 °C (30 s), 50 °C<br>(30 s), 72 °C (1.30<br>min), 72 °C (5 min)<br>× 30 cycles” | 110 | [34] |
